# Supplementary material for: Comparing quantile regression spline analyses and supervised machine learning for environmental quality assessment at coastal marine aquaculture installations
Source: PeerJ journal article supplement (doi:10.7717/peerj.15425), 2023-06-13
Supplement: Figure_S1.pdf [file Figure_S1.pdf]

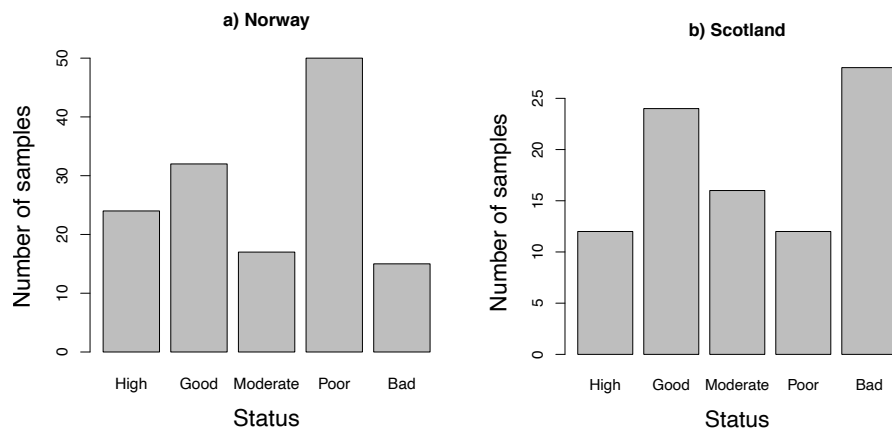

**Figure S1** The environmental status of samples based on IQI quality intervals for a) Norwegian samples (n= 138) and b) Scottish samples (n=92). The classification based on Phillips et al. (2014) is as follows: IQI 0-0.24 = High status, IQI 0.25-0.43 =Good status, IQI 0.44-0.63 = Moderate status, IQI 0.64-0.74 = Poor status, IQI 0.75-1 = Bad status.
