# Supplementary material for: Comparing quantile regression spline analyses and supervised machine learning for environmental quality assessment at coastal marine aquaculture installations
Source: PeerJ journal article supplement (doi:10.7717/peerj.15425), 2023-06-13
Supplement: Figure_S2.pdf [file Figure_S2.pdf]

## a) Norway

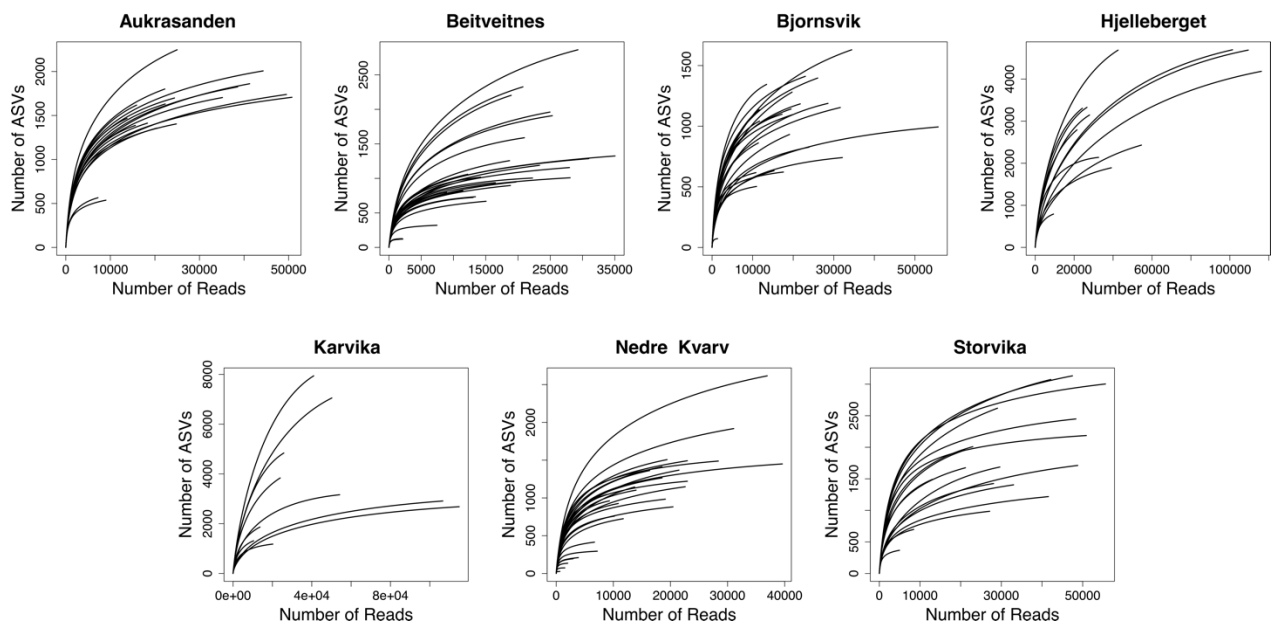

## b) Scotland

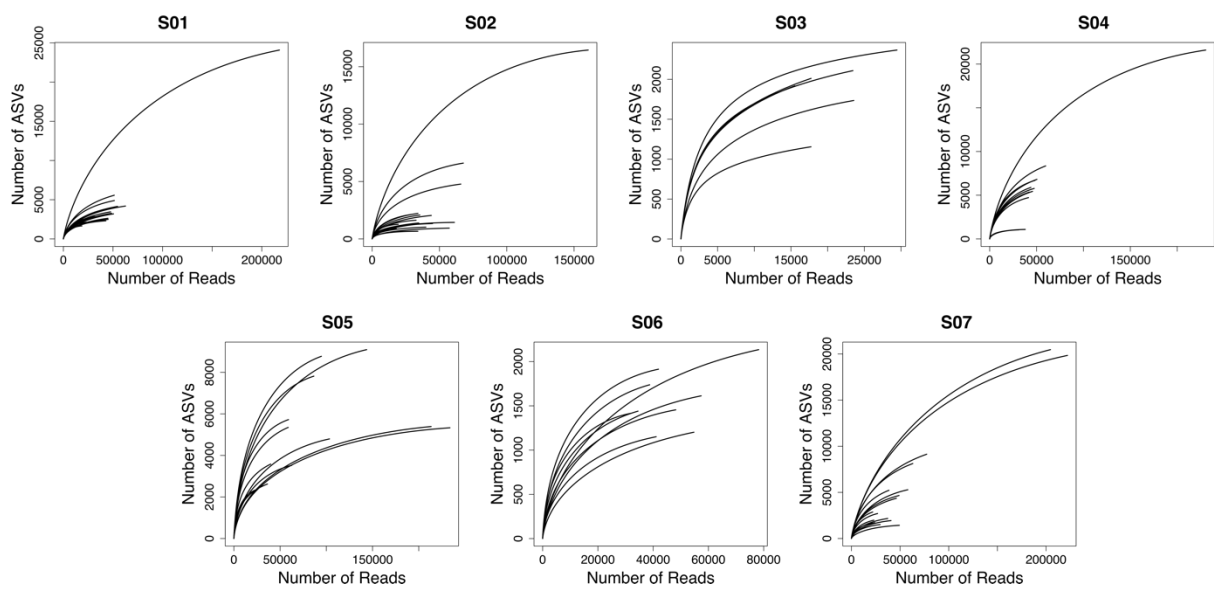

**Figure S2** Rarefaction curves showing the number of sequence reads against the number of ASVs for a) Norwegian farms (n= 138 samples) and b) Scotland (n=92 samples).
