# Supplementary material for: Comparing quantile regression spline analyses and supervised machine learning for environmental quality assessment at coastal marine aquaculture installations
Source: PeerJ journal article supplement (doi:10.7717/peerj.15425), 2023-06-13
Supplement: Figure_S3.pdf [file Figure_S3.pdf]

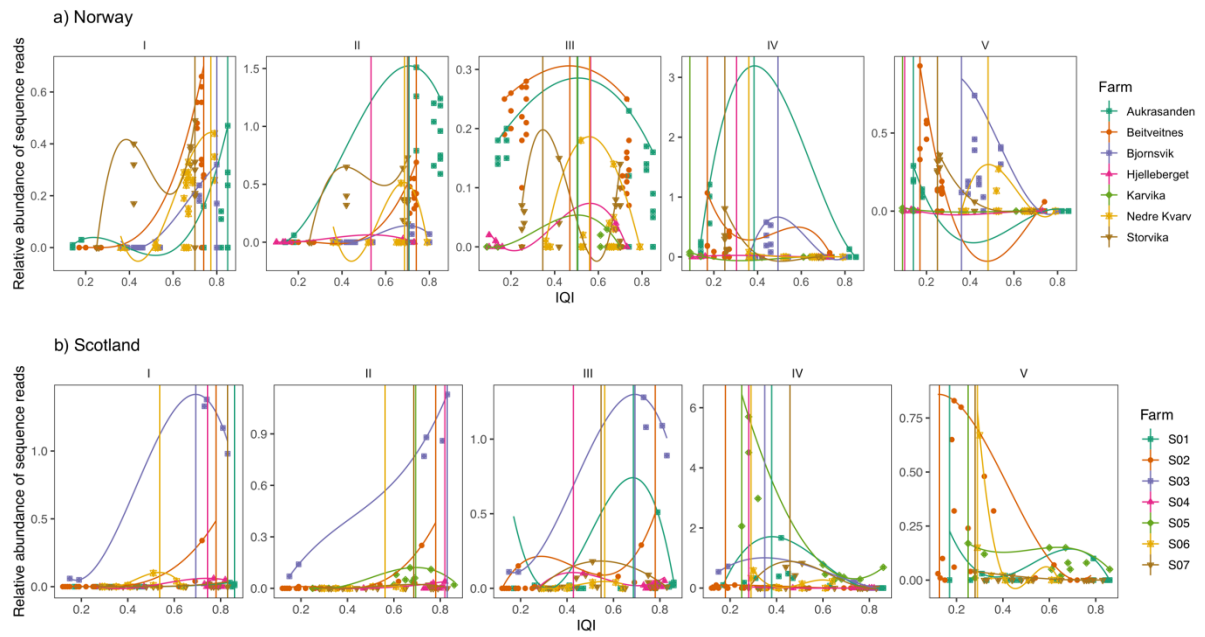

**Figure S3** Quantile Regression Spline plots showing the relative abundance of sequences reads of selected bacterial ASVs from Eco-Groups I to V as a function to the Infaunal Quality Index (IQI) for a) Norway salmon farms and b) Scotland salmon farms. Quantile regression splines were constructed at the 95th percentile ( $df = 3$ ). The IQI value at which the ASV has its peak abundance within a farm is indicated with a vertical line.
