# Supplementary material for: Comparing quantile regression spline analyses and supervised machine learning for environmental quality assessment at coastal marine aquaculture installations
Source: PeerJ. 2023 Jun 13;11:e15425. doi: 10.7717/peerj.15425 (PMC10274583; doi:10.7717/peerj.15425)
Supplement: Supplemental Information 5 — Data newly produced in this study (Scottish farms S01, S02, S05, S06, S07) are highlighted with grey. With bold we indicated the min and max values of high quality sequences reads. Distance represents the distance of the sampling site from the cage edge of the salmon farm. Missing information in metadata is indicated with ‘NA’. [file peerj-11-15425-s005.xlsx]

## Sheet: Supplementary Table S1
Table S1 Overview of sequencing data and information of sampling sites from seven Scottish salmon farms and seven Norwegian salmon farms. Data newly produced in this study (Scottish farms S01, S02, S05, S06, S07) are highlighted with grey. With bold we indicated the min and max values of high quality sequences reads. Distance represents the distance of the sampling site from the cage edge of the …
Sample	raw reads	filtered	merged	high quality	ASVs	Farm	Country	Station	Distance (m)	IQI	AMBI	Depth (m)
AK_0_G1_RepA	140387	81203	57253	44283	2007	Aukrasanden	Norway	AK_0	0	0.18	5.97	89
AK_0_G1_RepB	115996	69255	47515	35152	1704	Aukrasanden	Norway	AK_0	0	0.18	5.97	89
AK_0_G1_RepC	133917	78485	53443	38558	1825	Aukrasanden	Norway	AK_0	0	0.18	5.97	89
AK_0_G2_RepA	131643	78024	62067	49509	1739	Aukrasanden	Norway	AK_0	0	0.14	5.97	89
AK_0_G2_RepB	155649	82925	61754	50741	1707	Aukrasanden	Norway	AK_0	0	0.14	5.97	89
AK_0_G2_RepC	149230	79658	57566	41260	1861	Aukrasanden	Norway	AK_0	0	0.14	5.97	89
AK_1530_G1_RepA	168259	78390	43721	24980	2247	Aukrasanden	Norway	AK_1530	1530	0.85	1.3	168
AK_1530_G1_RepB	81468	27395	13024	9001	537	Aukrasanden	Norway	AK_1530	1530	0.85	1.3	168
AK_1530_G1_RepC	119396	61397	34682	22224	1801	Aukrasanden	Norway	AK_1530	1530	0.85	1.3	168
AK_1530_G2_RepA	116402	61705	29419	13756	1467	Aukrasanden	Norway	AK_1530	1530	0.85	1.39	168
AK_1530_G2_RepB	111595	57631	29765	15885	1618	Aukrasanden	Norway	AK_1530	1530	0.85	1.39	168
AK_1530_G2_RepC	124409	63434	32021	18320	1413	Aukrasanden	Norway	AK_1530	1530	0.85	1.39	168
AK_630_G1_RepA	92236	28208	13370	7222	565	Aukrasanden	Norway	AK_630	630	0.74	2.41	151
AK_630_G1_RepB	116049	55209	33125	24798	1404	Aukrasanden	Norway	AK_630	630	0.74	2.41	151
AK_630_G1_RepC	117817	57938	34305	22314	1631	Aukrasanden	Norway	AK_630	630	0.74	2.41	151
AK_630_G2_RepA	116461	55840	28526	15612	1387	Aukrasanden	Norway	AK_630	630	0.82	1.69	151
AK_630_G2_RepB	120965	56476	32231	20474	1357	Aukrasanden	Norway	AK_630	630	0.82	1.69	151
AK_630_G2_RepC	128148	65695	38036	24390	1699	Aukrasanden	Norway	AK_630	630	0.82	1.69	151
BJ_0_G1_RepA	99716	56351	43285	28572	1188	Bjornsvik	Norway	BJ_0	0	0.46	4.45	206
BJ_0_G1_RepB	151131	73205	64007	55737	994	Bjornsvik	Norway	BJ_0	0	0.46	4.45	206
BJ_0_G1_RepC	90729	42206	33726	23903	827	Bjornsvik	Norway	BJ_0	0	0.46	4.45	206
BJ_0_G2_RepA	79595	47214	27115	11700	1042	Bjornsvik	Norway	BJ_0	0	0.44	4.53	206
BJ_0_G2_RepB	113564	58447	34315	13442	1345	Bjornsvik	Norway	BJ_0	0	0.44	4.53	206
BJ_0_G2_RepC	91218	51931	34564	21728	1184	Bjornsvik	Norway	BJ_0	0	0.44	4.53	206
BJ_100_G1_RepA	120305	54264	35357	26033	1397	Bjornsvik	Norway	BJ_100	100	0.54	3.88	247
BJ_100_G1_RepB	110007	49621	31604	22992	1411	Bjornsvik	Norway	BJ_100	100	0.54	3.88	247
BJ_100_G1_RepC	102168	49236	27477	19470	1142	Bjornsvik	Norway	BJ_100	100	0.54	3.88	247
BJ_100_G2_RepA	107152	52240	40186	31603	1154	Bjornsvik	Norway	BJ_100	100	0.42	4.79	247
BJ_100_G2_RepB	156460	55455	36571	19722	1281	Bjornsvik	Norway	BJ_100	100	0.42	4.79	247
BJ_100_G2_RepC	19040	5397	2616	1357	73	Bjornsvik	Norway	BJ_100	100	0.42	4.79	247
BJ_280_G1_RepA	116116	50319	27327	19829	1095	Bjornsvik	Norway	BJ_280	280	0.8	1.79	310
BJ_280_G1_RepB	172357	47495	16148	10811	617	Bjornsvik	Norway	BJ_280	280	0.8	1.79	310
BJ_280_G1_RepC	110408	43989	22936	17579	622	Bjornsvik	Norway	BJ_280	280	0.8	1.79	310
BJ_280_G2_RepA	97698	37841	16636	10959	503	Bjornsvik	Norway	BJ_280	280	0.72	2.6	310
BJ_280_G2_RepB	505687	49213	19842	11414	862	Bjornsvik	Norway	BJ_280	280	0.72	2.6	310
BJ_280_G2_RepC	140615	55533	26623	17260	1099	Bjornsvik	Norway	BJ_280	280	0.72	2.6	310
BJ_38_G1_RepA	93173	41044	30665	19091	932	Bjornsvik	Norway	BJ_38	38	0.39	5.1	211
BJ_38_G1_RepB	78398	44761	27536	11597	1136	Bjornsvik	Norway	BJ_38	38	0.39	5.1	211
BJ_38_G2_RepA	118056	64853	51096	34417	1630	Bjornsvik	Norway	BJ_38	38	0.39	5.21	211
BJ_38_G2_RepB	80082	31657	23614	15298	633	Bjornsvik	Norway	BJ_38	38	0.36	5.21	211
BJ_38_G2_RepC	92644	48727	41145	32119	741	Bjornsvik	Norway	BJ_38	38	0.36	5.21	211
BV_0_G1_RepA	9828	5337	2071	1594	117	Beitveitnes	Norway	BV_0	0	0.25	5.98	98
BV_0_G1_RepB	77328	50323	30313	22251	1005	Beitveitnes	Norway	BV_0	0	0.25	5.98	98
BV_0_G1_RepC	85113	52052	37639	30967	1286	Beitveitnes	Norway	BV_0	0	0.25	5.98	98
BV_0_G2_RepA	78919	48534	35628	27972	1157	Beitveitnes	Norway	BV_0	0	0.25	5.99	98
BV_0_G2_RepB	80089	50621	25471	16499	939	Beitveitnes	Norway	BV_0	0	0.25	5.99	98
BV_0_G2_RepC	62584	37475	19775	13028	724	Beitveitnes	Norway	BV_0	0	0.25	5.99	98
BV_1110_G1_RepA	185894	84392	41880	20993	1589	Beitveitnes	Norway	BV_1110	1110	0.71	2.3	273
BV_1110_G1_RepB	183202	67110	30167	14200	1019	Beitveitnes	Norway	BV_1110	1110	0.71	2.3	273
BV_1110_G1_RepC	155562	56354	24712	13397	734	Beitveitnes	Norway	BV_1110	1110	0.71	2.3	273
BV_1110_G2_RepA	208788	91650	47294	24951	1961	Beitveitnes	Norway	BV_1110	1110	0.73	2.15	273
BV_1110_G2_RepB	217490	95090	48122	25319	1908	Beitveitnes	Norway	BV_1110	1110	0.73	2.15	273
BV_1110_G2_RepC	136711	32269	13512	7445	321	Beitveitnes	Norway	BV_1110	1110	0.73	2.15	273
BV_150_G1_RepA	74651	45558	32959	23332	1189	Beitveitnes	Norway	BV_150	150	0.17	5.84	85
BV_150_G1_RepB	105796	55693	44059	35039	1325	Beitveitnes	Norway	BV_150	150	0.17	5.84	85
BV_150_G1_RepC	8216	3863	2507	2150	121	Beitveitnes	Norway	BV_150	150	0.17	5.84	85
BV_150_G2_RepA	65112	40149	25826	13207	998	Beitveitnes	Norway	BV_150	150	0.2	5.68	85
BV_150_G2_RepB	80409	48956	32691	18689	1257	Beitveitnes	Norway	BV_150	150	0.2	5.68	85
BV_150_G2_RepC	59396	36669	22124	8927	801	Beitveitnes	Norway	BV_150	150	0.2	5.68	85
BV_430_G1_RepA	68017	38232	20723	12212	1060	Beitveitnes	Norway	BV_430	430	0.73	2.29	126
BV_430_G1_RepB	65732	34717	17866	7939	791	Beitveitnes	Norway	BV_430	430	0.73	2.29	126
BV_430_G1_RepC	177358	83320	46361	20767	2326	Beitveitnes	Norway	BV_430	430	0.73	2.29	126
BV_430_G2_RepA	224834	106204	59867	29283	2863	Beitveitnes	Norway	BV_430	430	0.74	2.3	126
BV_430_G2_RepB	159264	40445	19992	11448	823	Beitveitnes	Norway	BV_430	430	0.74	2.3	126
BV_430_G2_RepC	184101	81494	43620	18939	2203	Beitveitnes	Norway	BV_430	430	0.74	2.3	126
BV_75_G1_RepB	14406	6065	2885	2075	127	Beitveitnes	Norway	BV_75	75	0.27	5.97	83
BV_75_G1_RepC	71535	41149	27358	19702	948	Beitveitnes	Norway	BV_75	75	0.27	5.97	83
BV_75_G2_RepA	74791	41044	26330	18823	897	Beitveitnes	Norway	BV_75	75	0.27	5.99	83
BV_75_G2_RepB	78609	43420	32843	28082	1009	Beitveitnes	Norway	BV_75	75	0.27	5.99	83
BV_75_G2_RepC	59245	33444	21385	15051	669	Beitveitnes	Norway	BV_75	75	0.27	5.99	83
HJ_0_RepA	359866	152370	77056	32548	2139	Hjelleberget	Norway	HJ_0	0	0.14	5.88	93
HJ_0_RepB	352374	149613	63843	39111	1892	Hjelleberget	Norway	HJ_0	0	0.14	5.88	93
HJ_243_RepA	339726	122378	101514	54560	2431	Hjelleberget	Norway	HJ_243	243	0.13	5.86	94
HJ_243_RepB	578328	235582	199841	116174	4184	Hjelleberget	Norway	HJ_243	243	0.13	5.86	94
HJ_304_RepA	447364	214152	178234	109454	4689	Hjelleberget	Norway	HJ_304	304	0.16	5.74	85
HJ_304_RepB	449303	213003	177322	101372	4696	Hjelleberget	Norway	HJ_304	304	0.16	5.74	85
HJ_488_RepA	233794	94291	63835	24221	3305	Hjelleberget	Norway	HJ_488	488	0.68	2.26	109
HJ_488_RepB	288166	78443	54481	21471	2794	Hjelleberget	Norway	HJ_488	488	0.68	2.26	109
HJ_50_RepA	218450	38137	23036	9385	792	Hjelleberget	Norway	HJ_50	50	0.1	5.98	88
HJ_50_RepB	527222	156082	107413	42574	4688	Hjelleberget	Norway	HJ_50	50	0.1	5.98	88
HJ_588_RepA	382652	147547	92077	26597	3328	Hjelleberget	Norway	HJ_588	588	0.73	2.1	132
HJ_588_RepB	355389	138565	87995	27898	3146	Hjelleberget	Norway	HJ_588	588	0.73	2.1	132
KA_0_RepA	511415	153435	142791	114918	2682	Karvika	Norway	KA_0	0	0.14	5.89	127
KA_0_RepB	497449	150682	138503	106609	2912	Karvika	Norway	KA_0	0	0.14	5.89	127
KA_179_RepA	324299	32810	27230	20198	1179	Karvika	Norway	KA_179	179	0.09	5.98	112
KA_179_RepB	356365	95590	79246	54184	3163	Karvika	Norway	KA_179	179	0.09	5.98	112
KA_290_RepA	487168	54412	34283	13681	1865	Karvika	Norway	KA_290	290	0.61	2.59	125
KA_290_RepB	490807	187355	123332	50210	7052	Karvika	Norway	KA_290	290	0.61	2.59	125
KA_428_RepA	538648	197419	129946	40980	7942	Karvika	Norway	KA_428	428	0.7	2.65	131
KA_428_RepB	345936	96058	60474	23955	3838	Karvika	Norway	KA_428	428	0.7	2.65	131
KA_504_RepA	289560	43712	27387	10432	1312	Karvika	Norway	KA_504	504	0.64	2.54	131
KA_504_RepB	328130	130440	83380	25807	4840	Karvika	Norway	KA_504	504	0.64	2.54	131
NK_0_G1_RepA	40291	17639	9038	6709	415	Nedre_Kvarv	Norway	NK_0	0	0.38	4.98	174
NK_0_G1_RepC	35042	14941	8785	7195	295	Nedre_Kvarv	Norway	NK_0	0	0.38	4.98	174
NK_0_G2_RepA	103721	59863	45010	39583	1450	Nedre_Kvarv	Norway	NK_0	0	0.36	5.14	174
NK_0_G2_RepB	111215	11212	5553	3881	210	Nedre_Kvarv	Norway	NK_0	0	0.36	5.14	174
NK_1130_G1_RepA	94573	49394	23151	13984	1103	Nedre_Kvarv	Norway	NK_1130	1330	0.69	2.46	367
NK_1130_G1_RepB	110078	54272	20959	9323	961	Nedre_Kvarv	Norway	NK_1130	1330	0.69	2.46	367
NK_1130_G1_RepC	92213	45095	18937	10874	926	Nedre_Kvarv	Norway	NK_1130	1330	0.69	2.46	367
NK_1130_G2_RepA	97364	47542	18702	10197	759	Nedre_Kvarv	Norway	NK_1130	1330	0.79	1.68	367
NK_1130_G2_RepB	84475	46973	19223	8867	1046	Nedre_Kvarv	Norway	NK_1130	1330	0.79	1.68	367
NK_1130_G2_RepC	101151	59165	28338	16355	1362	Nedre_Kvarv	Norway	NK_1130	1330	0.79	1.68	367
NK_140_G1_RepA	81027	43876	28490	22960	1492	Nedre_Kvarv	Norway	NK_140	140	0.67	3.19	296
NK_140_G1_RepB	70953	37448	23712	19112	984	Nedre_Kvarv	Norway	NK_140	140	0.67	3.19	296
NK_140_G1_RepC	128839	65172	41663	31078	1918	Nedre_Kvarv	Norway	NK_140	140	0.67	3.19	296
NK_140_G2_RepA	132957	79345	51018	36946	2616	Nedre_Kvarv	Norway	NK_140	140	0.67	3.07	296
NK_140_G2_RepB	7697	3308	1097	641	27	Nedre_Kvarv	Norway	NK_140	140	0.67	3.07	296
NK_140_G2_RepC	81820	47655	27464	18526	1413	Nedre_Kvarv	Norway	NK_140	140	0.67	3.07	296
NK_34_G1_RepA	122458	50468	31965	22595	1148	Nedre_Kvarv	Norway	NK_34	34	0.53	4.17	171
NK_34_G1_RepB	72837	35647	18803	11744	725	Nedre_Kvarv	Norway	NK_34	34	0.53	4.17	171
NK_34_G1_RepC	82659	49909	26357	13740	1145	Nedre_Kvarv	Norway	NK_34	34	0.53	4.35	171
NK_34_G2_RepA	15266	6478	3096	2017	136	Nedre_Kvarv	Norway	NK_34	34	0.52	4.35	171
NK_34_G2_RepB	72539	40032	26518	20449	882	Nedre_Kvarv	Norway	NK_34	34	0.52	4.35	171
NK_34_G2_RepC	84136	49982	31895	21495	1368	Nedre_Kvarv	Norway	NK_34	34	0.52	2.57	332
NK_640_G1_RepA	116122	66046	31189	19409	1507	Nedre_Kvarv	Norway	NK_640	640	0.65	2.57	332
NK_640_G1_RepB	98966	53611	33626	28382	1488	Nedre_Kvarv	Norway	NK_640	640	0.65	2.57	332
NK_640_G1_RepC	94723	51322	26627	18537	1265	Nedre_Kvarv	Norway	NK_640	640	0.65	2.57	332
NK_640_G2_RepA	33895	13972	4984	2970	195	Nedre_Kvarv	Norway	NK_640	640	0.66	2.41	332
NK_640_G2_RepB	111180	49469	28563	22961	1221	Nedre_Kvarv	Norway	NK_640	640	0.66	2.41	332
NK_640_G2_RepC	16203	5560	1896	1514	74	Nedre_Kvarv	Norway	NK_640	640	0.66	2.41	332
ST_0_G1_RepA	161475	76173	51845	33003	1405	Storvika	Norway	ST_0	0	0.25	5.98	139
ST_0_G1_RepB	184645	89804	68968	48781	1712	Storvika	Norway	ST_0	0	0.25	5.98	139
ST_0_G1_RepC	165589	78086	57712	29642	1687	Storvika	Norway	ST_0	0	0.25	5.98	139
ST_0_G2_RepA	149534	77191	48522	28090	1425	Storvika	Norway	ST_0	0	0.26	5.98	139
ST_0_G2_RepB	175840	64119	40652	27135	986	Storvika	Norway	ST_0	0	0.26	5.98	139
ST_0_G2_RepC	193592	75597	54899	41564	1218	Storvika	Norway	ST_0	0	0.26	5.98	139
ST_300_G1_RepA	131920	63724	34190	21175	1675	Storvika	Norway	ST_300	300	0.68	2.4	136
ST_300_G1_RepB	185271	93526	58545	42159	3074	Storvika	Norway	ST_300	300	0.68	2.4	136
ST_300_G1_RepC	177902	96202	61568	47483	3132	Storvika	Norway	ST_300	300	0.68	2.4	136
ST_300_G2_RepA	84717	31209	14471	8451	698	Storvika	Norway	ST_300	300	0.7	2.4	136
ST_300_G2_RepB	159803	82562	56523	48335	2449	Storvika	Norway	ST_300	300	0.7	2.4	136
ST_300_G2_RepC	178583	94146	64966	55599	3003	Storvika	Norway	ST_300	300	0.7	2.4	136
ST_68_G1_RepA	150552	76288	42454	20958	1953	Storvika	Norway	ST_68	68	0.42	4.7	134
ST_68_G1_RepB	241831	92936	44920	29048	2619	Storvika	Norway	ST_68	68	0.42	4.7	134
ST_68_G1_RepC	74275	24991	11206	4948	367	Storvika	Norway	ST_68	68	0.42	4.7	134
ST_68_G2_RepA	159853	77602	37978	22982	2009	Storvika	Norway	ST_68	68	0.7	4.7	134
ST_68_G2_RepB	190661	91296	57163	50893	2186	Storvika	Norway	ST_68	68	0.7	4.7	134
ST_68_G2_RepC	127582	55873	27681	13102	1492	Storvika	Norway	ST_68	68	0.7	4.7	134
S01_0_RepA	177759	79883	44095	13510	1553	S01	Scotland	S01_0	0	0.42	4.52	NA
S01_0_RepB	174760	84622	52812	23108	2139	S01	Scotland	S01_0	0	0.41	4.43	NA
S01_25SE_RepA	170545	91408	72217	44886	2631	S01	Scotland	S01_25	25	0.17	5.86	NA
S01_25SE_RepB	219565	108108	76948	42824	2311	S01	Scotland	S01_25	25	0.26	5.59	NA
S01_37_RepA	154370	83059	63366	36805	2360	S01	Scotland	S01_37	37	0.63	3.23	NA
S01_37_RepB	184450	99386	67945	31818	2851	S01	Scotland	S01_37	37	0.45	4.44	NA
S01_47_RepA	186443	105421	70540	34426	2806	S01	Scotland	S01_47	47	0.31	5.29	NA
S01_47_RepB	169582	90794	60004	31187	2183	S01	Scotland	S01_47	47	0.47	4.4	NA
S01_50NE_RepA	232459	92687	47765	18666	1655	S01	Scotland	S01_50_NE	50	0.79	1.98	NA
S01_50NE_RepB	187434	88069	72119	50551	3196	S01	Scotland	S01_50_NE	50	0.86	1.37	NA
S01_50SE_RepA	218239	105271	93882	62617	4194	S01	Scotland	S01_50_SE	50	0.33	5.35	NA
S01_50SE_RepB	172111	89709	71253	45158	2494	S01	Scotland	S01_50_SE	50	0.41	4.95	NA
S01_57_RepA	167124	88526	71880	51389	4892	S01	Scotland	S01_57	57	0.84	1.22	NA
S01_57_RepB	161790	80827	65299	47601	3454	S01	Scotland	S01_57	57	0.85	1.22	NA
S01_Ref1_RepA	145936	78175	77689	51298	5570	S01	Scotland	S01_REF1	590	0.79	1.99	NA
S01_Ref1_RepB	156368	87825	374364	217793	24087	S01	Scotland	S01_REF1	590	0.86	1.22	NA
S01_Ref2_RepA	223869	93444	66316	48504	3273	S01	Scotland	S01_REF2	670	0.78	2.09	NA
S01_Ref2_RepB	743998	436281	74406	54618	4150	S01	Scotland	S01_REF2	670	0.85	1.33	NA
S02_0T1_RepA	174719	73259	56096	33954	669	S02	Scotland	S02_0_T1	0	0.19	6	28
S02_0T1_RepB	227171	92095	74708	44871	1339	S02	Scotland	S02_0_T1	0	0.19	6	28
S02_0T2_RepA	200723	95789	80235	43946	2043	S02	Scotland	S02_0_T2	0	0.18	5.98	28
S02_0T2_RepB	192646	71656	60654	34620	1387	S02	Scotland	S02_0_T2	0	0.22	5.95	28
S02_17T2_RepA	178010	86816	72085	35466	2079	S02	Scotland	S02_17	17	0.36	4.94	28
S02_17T2_RepB	185368	94438	71712	34033	2221	S02	Scotland	S02_17	17	0.19	5.65	28
S02_27T2_RepB	164822	77238	62377	28499	2119	S02	Scotland	S02_27	27	0.32	5.23	27
S02_37T2_RepA	177249	97910	82618	57312	941	S02	Scotland	S02_37	37	0.54	3.92	27
S02_37T2_RepB	223452	79588	60371	39933	1026	S02	Scotland	S02_37	37	0.62	3.31	27
S02_50T1_RepA	210316	81062	56334	29225	1263	S02	Scotland	S02_50	50	0.25	5.96	28
S02_50T1_RepB	277831	96554	69292	32636	1630	S02	Scotland	S02_50	50	0.14	5.99	28
S02_60T1_RepA	166872	84967	58309	28632	1219	S02	Scotland	S02_60	60	0.26	5.91	26
S02_60T1_RepB	247516	93616	56722	19457	1273	S02	Scotland	S02_60	60	0.12	5.99	26
S02_70T1_RepA	193828	98923	79525	44767	1387	S02	Scotland	S02_70	70	0.15	5.98	26
S02_70T1_RepB	245621	95095	82574	61130	1440	S02	Scotland	S02_70	70	0.13	5.98	26
S02_Ref1_RepA	159286	59021	38606	17960	900	S02	Scotland	S02_REF1	771	0.72	2.4	21
S02_Ref1_RepB	803469	423790	356260	160518	16451	S02	Scotland	S02_REF1	771	0.69	2.65	21
S02_Ref2_RepA	186657	102766	92796	67726	6604	S02	Scotland	S02_REF2	1115	0.76	2.09	23
S02_Ref2_RepB	202366	109596	96280	65865	4777	S02	Scotland	S02_REF2	1115	0.78	1.93	23
S03_AZE_RepA	95570	60328	32506	17734	1155	S03	Scotland	S03_AZE	109	0.73	2.3	27
S03_AZE_RepB	84038	48188	30739	23565	1735	S03	Scotland	S03_AZE	109	0.74	2.16	27
S03_CE_RepA	103045	72231	23622	23448	2109	S03	Scotland	S03_CE	0	0.19	5.7	29
S03_CE_RepB	82863	55676	36418	17739	2012	S03	Scotland	S03_CE	0	0.15	5.85	29
S03_REF_RepA	97439	64127	38078	29451	2367	S03	Scotland	S03_REF	1000	0.83	1.32	21
S03_REF_RepB	56262	38153	25989	15529	1919	S03	Scotland	S03_REF	1000	0.81	1.65	21
S04_0_RepA	189817	117861	68877	37935	1084	S04	Scotland	S04_0	0	0.28	5.52	40
S04_0_RepB	177970	104811	51316	31157	1042	S04	Scotland	S04_0	0	0.47	4.09	40
S04_113_RepA	168040	99177	66716	43938	5889	S04	Scotland	S04_113	113	0.75	2.17	42
S04_113_RepB	178759	117791	81838	59709	8352	S04	Scotland	S04_113	113	0.74	2.05	42
S04_123_RepA	169877	104143	65502	45686	5439	S04	Scotland	S04_123	123	0.8	1.63	41
S04_123_RepB	158459	101166	68182	48290	6696	S04	Scotland	S04_123	123	0.73	2.31	41
S04_133_RepA	165970	103838	59689	42164	5358	S04	Scotland	S04_133	133	0.78	1.93	41
S04_133_RepB	168839	104084	69236	50385	6813	S04	Scotland	S04_133	133	0.81	1.59	41
S04_Ref1_RepA	188261	117970	67008	47484	5776	S04	Scotland	S04_REF1	1059	0.76	2.14	33
S04_Ref1_RepB	725904	485584	347076	230437	21605	S04	Scotland	S04_REF1	1059	0.78	1.38	33
S04_Ref2_RepA	174238	107593	62368	40558	5287	S04	Scotland	S04_REF2	521	0.77	1.99	44
S04_Ref2_RepB	172104	104079	66253	41389	4723	S04	Scotland	S04_REF2	521	0.82	1.44	44
S05_0_RepA	327979	359490	325627	213411	5391	S05	Scotland	S05_0	0	0.28	5.96	NA
S05_0_RepB	394971	383201	358321	233734	5331	S05	Scotland	S05_0	0	0.28	5.9	NA
S05_25N_RepA	187065	145865	117298	62560	3521	S05	Scotland	S05_25N	25	0.32	5.13	NA
S05_25N_RepB	319981	219025	185682	103430	4795	S05	Scotland	S05_25N	25	0.25	5.67	NA
S05_25S_RepA	43876	112798	71728	39887	3583	S05	Scotland	S05_25S	25	0.61	3.16	NA
S05_25S_RepB	297230	247949	173170	86523	7816	S05	Scotland	S05_25S	25	0.65	3.08	NA
S05_50N_RepA	351588	336803	253305	143651	9092	S05	Scotland	S05_50N	50	0.6	3.5	NA
S05_50N_RepB	332453	90590	61065	36352	2624	S05	Scotland	S05_50N	50	0.67	3.08	NA
S05_50S_RepA	324415	168182	109807	58789	5349	S05	Scotland	S05_50S	50	0.69	2.76	NA
S05_50S_RepB	425918	253183	173023	94676	8772	S05	Scotland	S05_50S	50	0.68	3.01	NA
S05_75S_RepA	321621	163255	105312	59108	5724	S05	Scotland	S05_75S	75	0.76	2.16	NA
S05_75S_RepB	246473	77452	51266	25121	2366	S05	Scotland	S05_75S	75	0.86	1.23	NA
S06_0_RepA	189725	86567	63520	34521	1440	S06	Scotland	S06_0	0	0.29	5.97	29
S06_0_RepB	194786	85147	62211	31822	1415	S06	Scotland	S06_0	0	0.3	5.86	29
S06_44_RepA	183838	99804	81931	54747	1202	S06	Scotland	S06_44	44	0.35	5.7	34
S06_44_RepB	189684	100550	77229	48189	1455	S06	Scotland	S06_44	44	0.41	5.22	34
S06_54_RepA	200683	110440	92513	57380	1613	S06	Scotland	S06_54	54	0.51	3.74	32
S06_54_RepB	218369	135074	115025	78199	2135	S06	Scotland	S06_54	54	0.4	5.25	32
S06_64_RepA	203245	100948	71325	38736	1738	S06	Scotland	S06_64	64	0.51	4.25	24
S06_64_RepB	224232	114760	77719	41931	1914	S06	Scotland	S06_64	64	0.61	3.29	24
S06_Start2_RepA	158583	72396	59237	41098	1151	S06	Scotland	S06_START2	261	0.64	2.66	27
S07_0_RepA	193069	96170	78296	49249	1430	S07	Scotland	S07_0	0	0.32	5.89	NA
S07_0_RepB	175274	75690	56263	29520	1516	S07	Scotland	S07_0	0	0.28	5.87	NA
S07_100SE_RepA	235993	95860	59692	21913	2870	S07	Scotland	S07_100SE	100	0.51	3.47	NA
S07_100SE_RepB	989222	539838	433073	204526	20469	S07	Scotland	S07_100SE	100	0.75	2.33	NA
S07_37_RepA	175557	92421	69689	37327	2171	S07	Scotland	S07_37	37	0.38	5.5	NA
S07_37_RepB	214065	114614	94586	57961	5285	S07	Scotland	S07_37	37	0.53	4.04	NA
S07_47_RepA	167267	81549	55695	23012	1983	S07	Scotland	S07_47	47	0.33	5.67	NA
S07_47_RepB	195925	99892	76121	40689	1942	S07	Scotland	S07_47	47	0.44	4.99	NA
S07_57_RepA	178039	93603	74771	46203	4362	S07	Scotland	S07_57	57	0.75	2.3	NA
S07_57_RepB	161939	107188	94969	63087	8125	S07	Scotland	S07_57	57	0.65	2.86	NA
S07_75SE_RepA	184333	96432	63354	26891	2707	S07	Scotland	S07_75SE	75	0.48	3.31	NA
S07_75SE_RepB	224784	84164	53752	24119	1711	S07	Scotland	S07_75SE	75	0.44	4.99	NA
S07_Ref1_RepA	240498	129674	115474	77389	9137	S07	Scotland	S07_REF1	700	0.79	1.81	NA
S07_Ref1_RepB	589352	352140	324213	221988	19842	S07	Scotland	S07_REF1	700	0.83	1.26	NA
S07_Ref2_RepA	163616	90250	74579	48964	4662	S07	Scotland	S07_REF2	500	0.76	1.91	NA
S07_Ref2_RepB	144221	79224	61443	38575	5225	S07	Scotland	S07_REF2	500	0.77	2.1	NA
